# Supplementary material for: A novel platform to enable inhaled naked RNAi medicine for lung cancer
Source: PubMed Central journal article supplement — Sci Rep. 2013 Nov 25;3:3325. doi: 10.1038/srep03325 (PMC3839038; doi:10.1038/srep03325), 2013-11-25
Supplement: srep03325-s1.pdf [file srep03325-s1.pdf]

## **Supplementary Information**

### **A novel platform to enable inhaled naked RNAi medicine for lung cancer**

*Yu Fujita, Fumitaka Takeshita, Takayuki Mizutani, Tadaaki Ohgi, Kazuyoshi Kuwano, Takahiro Ochiya*

# Supplementary Figure 1

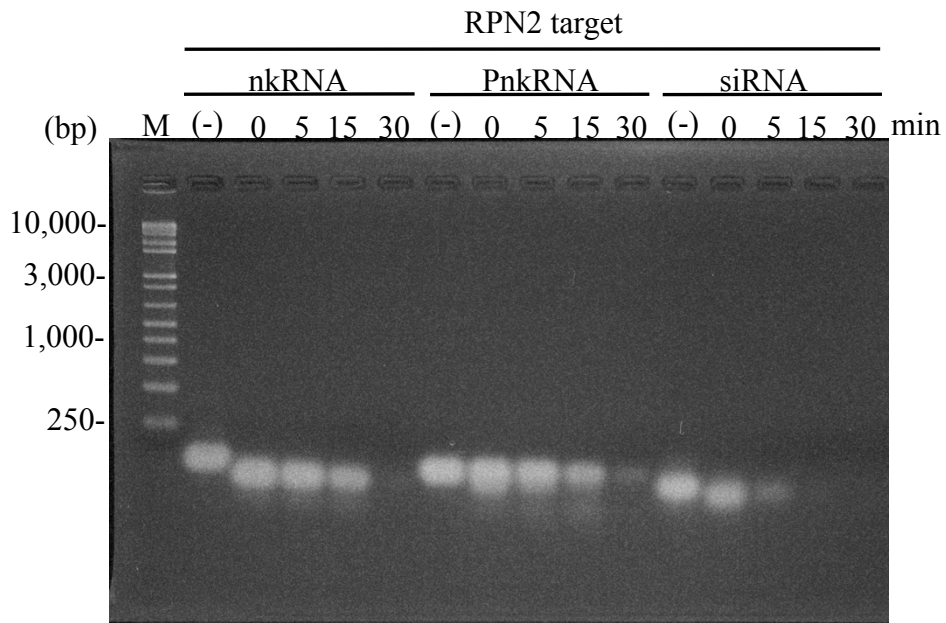

**Supplementary Figure 1. Stability of siRNA, PnkRNA, and nkRNA directed against human RPN2.**

To evaluate *in vitro* stability, each RNA was incubated at 37°C in the presence of RNase and then separated on a 3% agarose gel. Both nkRNA and PnkRNA were more resistant to degradation than siRNA.

## Supplementary Figure 2

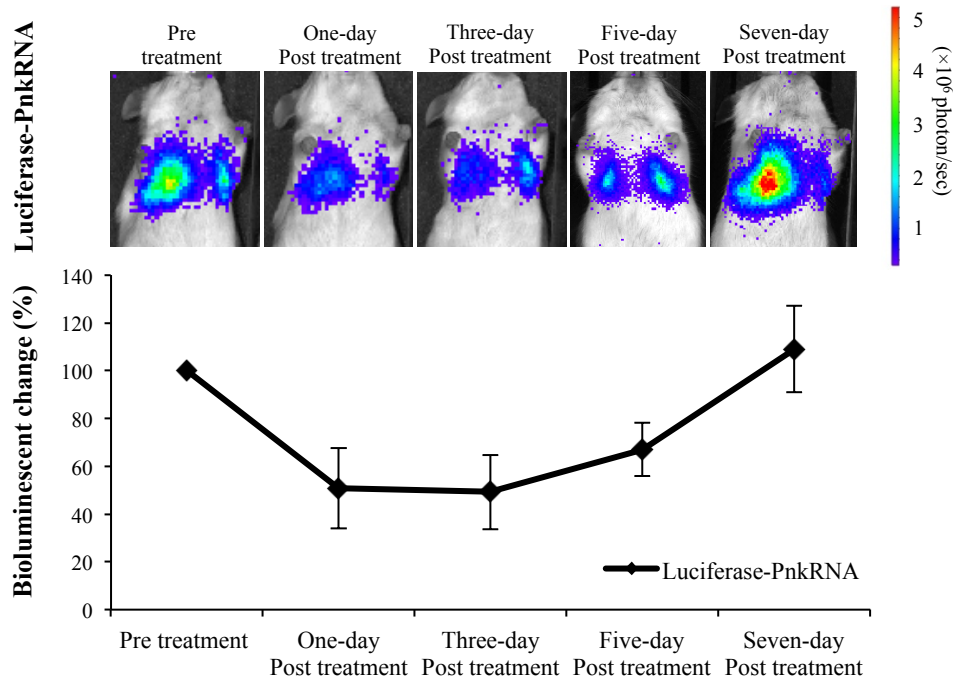

**Supplementary Figure 2. The pharmacodynamics of luciferase-PnkRNA *in vivo*.** Monitoring luciferase inhibition by PnkRNA *in vivo* with bioluminescent imaging. Representative images from pre-treatment to on seven-day post-treatment.

## Supplementary Figure 3

**a**

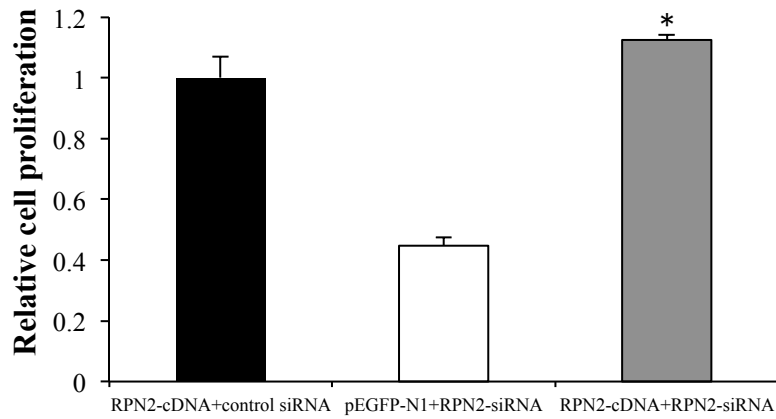

**b**

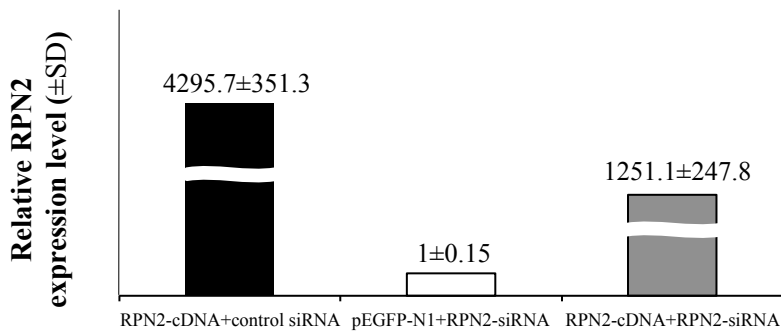

### Supplementary Figure 3. Rescue of RPN2-siRNA induces phenotype.

(a) Rescue of RPN2-siRNA induces a phenotype. A549-luc-C8 cells were transfected with RPN2-cDNA or control vector combined with siRNA. Cell proliferation was measured 96 h after cotransfection. (b) The expression of RPN2-mRNA after the rescue of RPN2-siRNA. Measurements of human RPN2 expression levels by real-time RT-PCR. The data are represented by the means  $\pm$  SD ( $n=3$ ). \*,  $P<0.05$  versus the pEGFP-N1+RPN2-siRNA group.

## Supplementary Figure 4

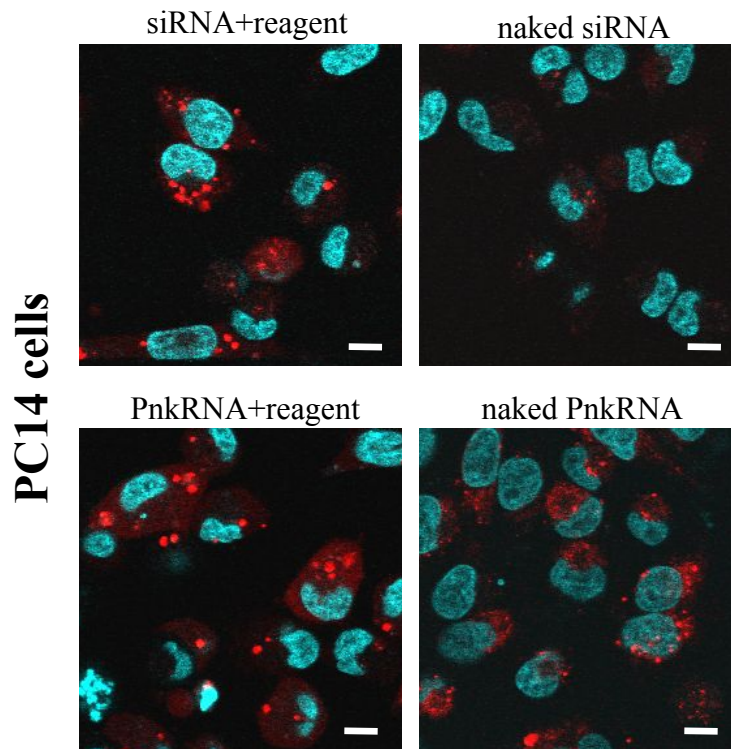

**Supplementary Figure 4. Endocytosis assay for naked RNAi therapeutic agents on PC14 cells.** Naked PnkRNAs are incorporated into the PC14 cell cytoplasm by the mechanism of endocytosis without delivery reagents. The scale bars indicate 10  $\mu\text{m}$ .

## Supplementary Figure 5

**a**

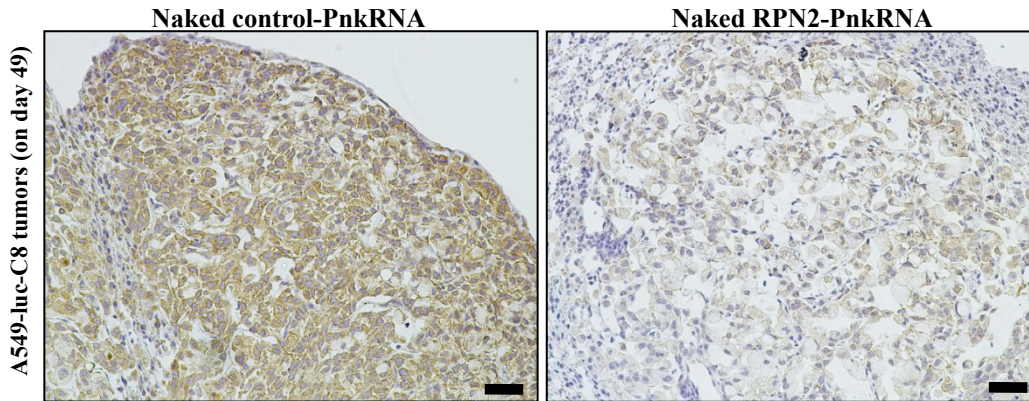

**b**

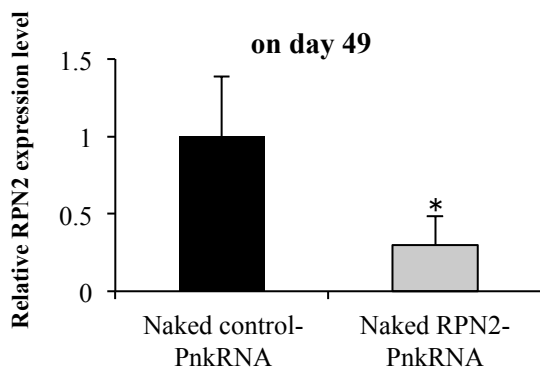

**c**

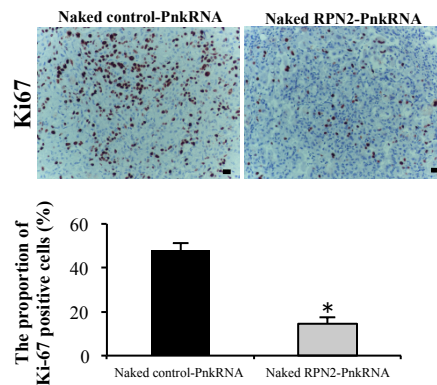

**Supplementary Figure 5. The effect of repeat administration study with naked RPN2-PnkRNA.** (a) Immunohistochemical staining for RPN2 proteins in representative tumours of lung cancer models on day 49. The scale bars indicate 100 μm. (b) The expression of RPN2-mRNA after the repeat administration. Measurements of human RPN2 expression levels by real-time RT-PCR. (c) Immunohistochemical analysis of Ki67 in representative tumors of lung cancer models on day 49. The scale bars indicate 100 μm. The data are represented as the means ± SD ( $n=12$ ). \*,  $P<0.05$  versus the naked control-PnkRNA group.

## Supplementary Tables

**Table 1. Sequence of siRNA, nkRNA, and PnkRNA directed against luciferase mRNA**

| RNA class     | Sequence                                                                        | Mass           |
|---------------|---------------------------------------------------------------------------------|----------------|
| Target siRNA  | : 5'-CCUACGCCGAGUACUUCGATT-3' (sense) / 5'-UCGAAGUACUCGGCGUAGGTT-3' (antisense) | 6605.1/ 6725.2 |
| Target nkRNA  | : 5'- ACCUACGCCGAGUACUUCGAUUCCCCACACCGGAAUCGAAGUACUCGGCGUAGGUUCUUCGG-3'         | 19785.7        |
| Target PnkRNA | : 5'- ACCUACGCCGAGUACUUCGAUUC-P-GGAAUCGAAGUACUCGGCGUAGGUUC-P-G-3'               | 17063.4        |

**Table 2. Sequence of siRNA, nkRNA, and PnkRNA directed against human RPN2 mRNA**

| RNA class      | Sequence                                                                          | Mass           |
|----------------|-----------------------------------------------------------------------------------|----------------|
| Target siRNA   | : 5'- GGCCACUGUAAAACUAGAACA-3' (sense) / 5'-UUCUAGUUU AACAGUGGCCUG-3' (antisense) | 6703.1/ 6651.0 |
| Target nkRNA   | : 5'- AGGCCACUGUAAAACUAGAACACCCACACCGGUGUUCUAGUUU AACAGUGGCCUGCUUCGG-3'           | 19794.75       |
| Target PnkRNA  | : 5'- AGGCCACUGUAAAACUAGAACACC-P-GGUGUUCUAGUUU AACAGUGGCCUGC-P-G-3'               | 17072.42       |
| Control PnkRNA | : 5'- AUACUAUUCGACACGCGAAGUUC-P-GGAACUUCGCGUGUCGAAUAGUAUUC-P-G-3'                 | 17033.4        |
